# Supplementary material for: Core-shell structured NaMnF3: Yb, Er nanoparticles for bioimaging applications
Source: Royal Society of Chemistry journal article supplement (doi:10.1039/c7ra10393j), 2017-01-01
Supplement: c7ra10393j1.pdf [file c7ra10393j1.pdf]

## Core-shell Structured NaMnF<sub>3</sub>:Yb,Er Nanoparticles for bioimaging application

Shuai Ye, Mengjie Zhao, Jun Song,\* Junle Qu\*

Key Lab of Optoelectronic Devices and Systems of Ministry of Education/Guangdong Province,  
College of Optoelectronic Engineering, Shenzhen University, Shenzhen 518060, China

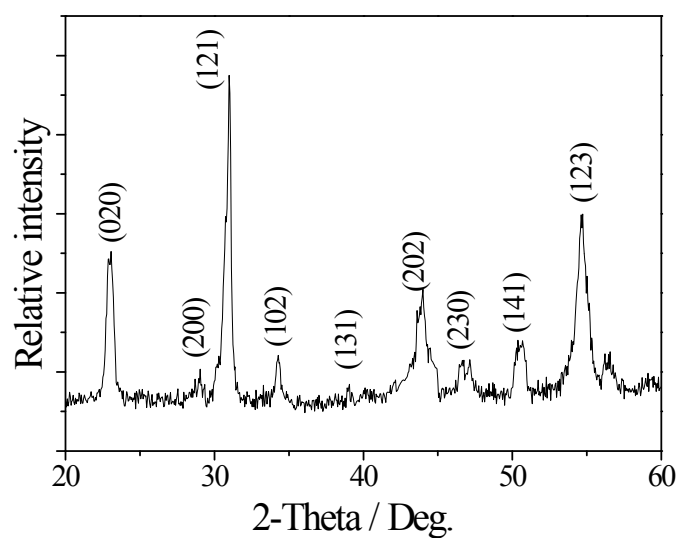

S1 XRD pattern of NaMnF<sub>3</sub>:Yb<sup>3+</sup>20%,Er<sup>3+</sup>2% nanoparticles. The measured patterns indicated the prepared nanoparticles had crystallographic phases to the standard NaMnF<sub>3</sub> host lattice of JCPDS

18-1224

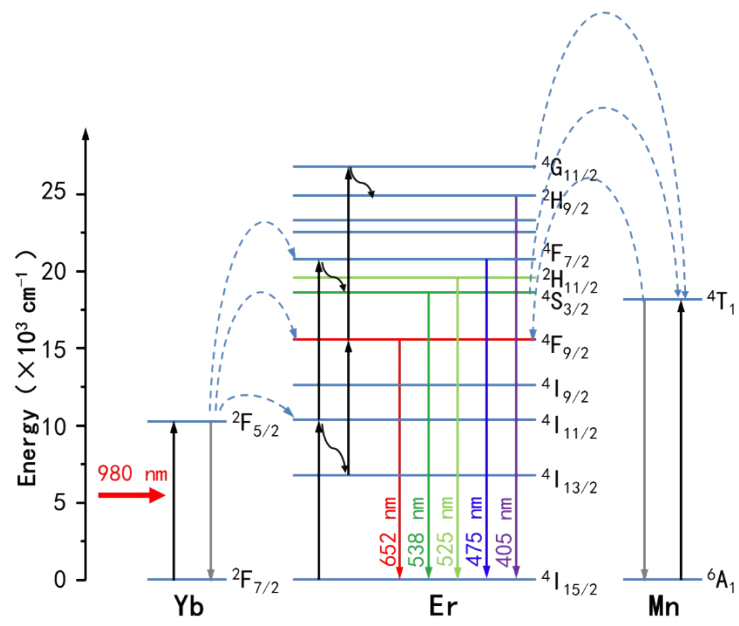

S2 Energy level diagrams of the  $\text{Er}^{3+}$ ,  $\text{Yb}^{3+}$  ions and  $\text{Mn}^{2+}$  as well as the involved UC mechanisms

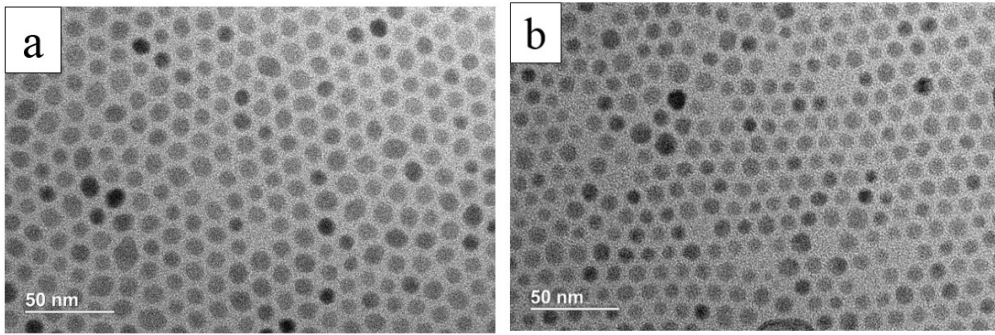

S3 Typical TEM images of (a) NaMnF<sub>3</sub>:Yb<sup>3+</sup>20%,Ho<sup>3+</sup>2% and (b)NaMnF<sub>3</sub>:Yb<sup>3+</sup>20%,Tm<sup>3+</sup>1% nanoparticle

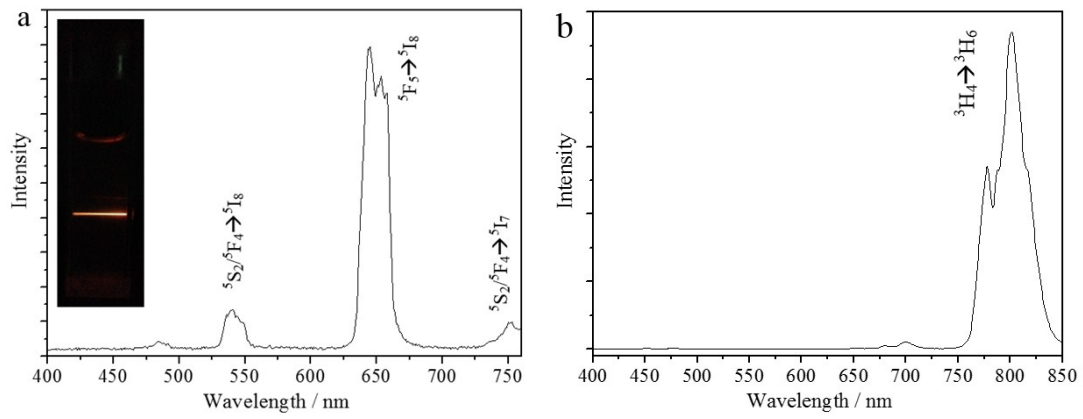

S4 photoluminescence spectra of (a) NaMnF<sub>3</sub>:Yb<sup>3+</sup>20%,Ho<sup>3+</sup>2% and (b)NaMnF<sub>3</sub>:Yb<sup>3+</sup>20%,Tm<sup>3+</sup>1% nanoparticle. The inset in Fig.S3. a shows the size distribution of NaMnF<sub>3</sub>: 20% Yb<sup>3+</sup>, 2% Er<sup>3+</sup> nanoparticles

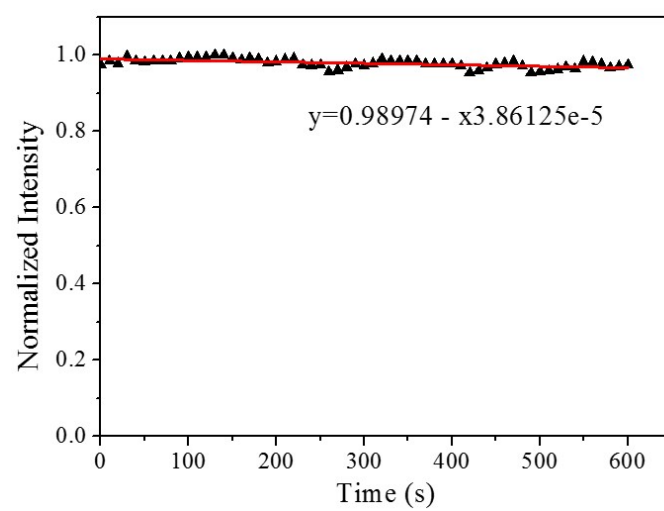

S5 photoluminescence intensity of PAAM-UCNPs irradiated different time

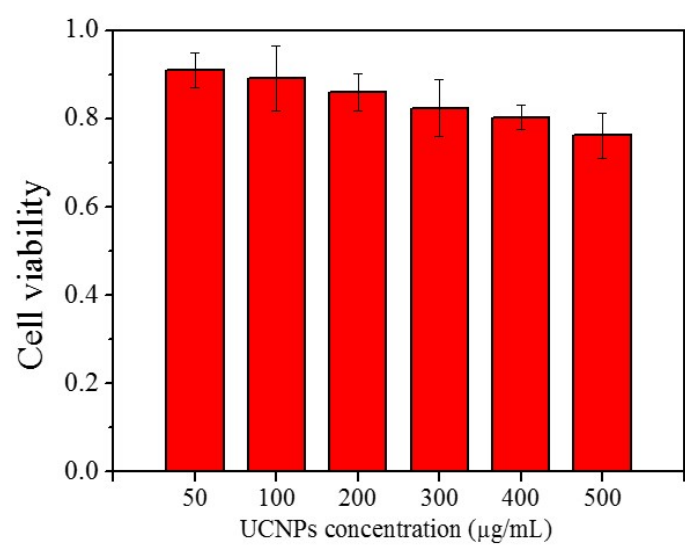

S6 Viability of HeLa cells incubated with PAAM-UCNPs at different concentrations

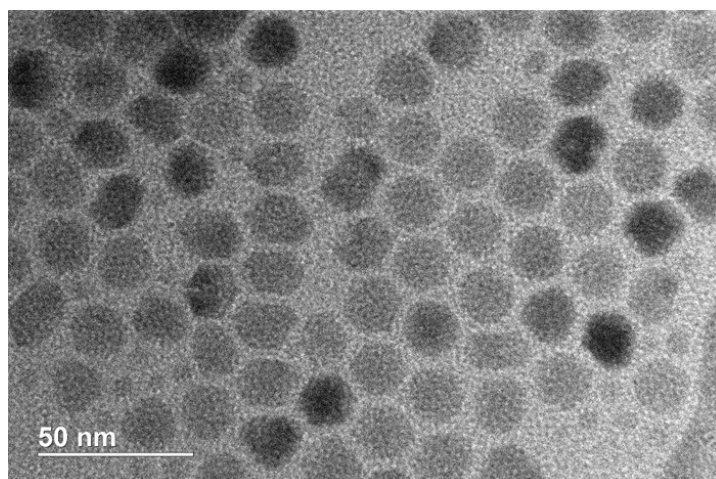

S7 Typical TEM images of  $\text{NaMnF}_3:\text{Yb}^{3+}20\%,\text{Er}^{3+}2\% @ \text{NaMnF}_3:\text{Yb}^{3+}20\%,\text{Nd}^{3+}20\%$  nanoparticles
